# Supplementary figures and images for: Blood-brain barrier-restricted translocation of Toxoplasma gondii from cortical capillaries
Source: eLife journal article supplement (doi:10.7554/elife.69182), 2021-12-08

Representative blot used in Figure 9a.

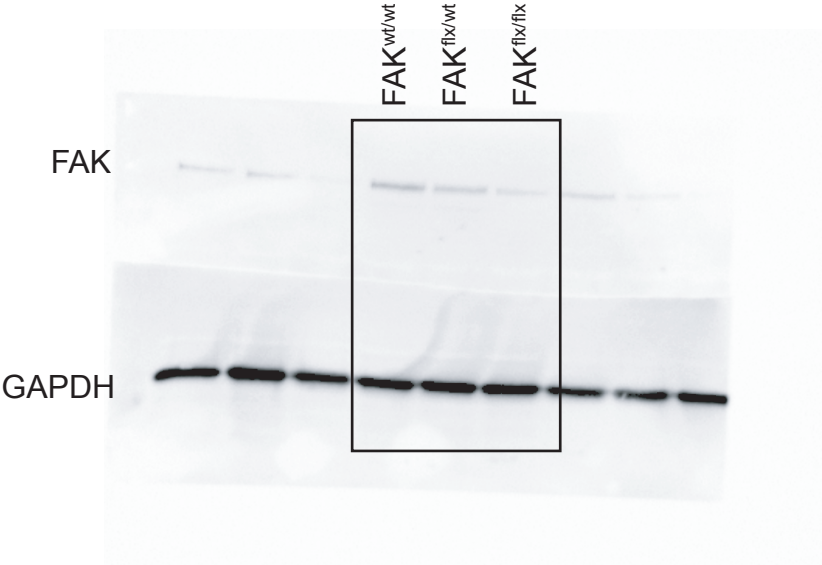

Blots used for bar graph in Figure 9a.

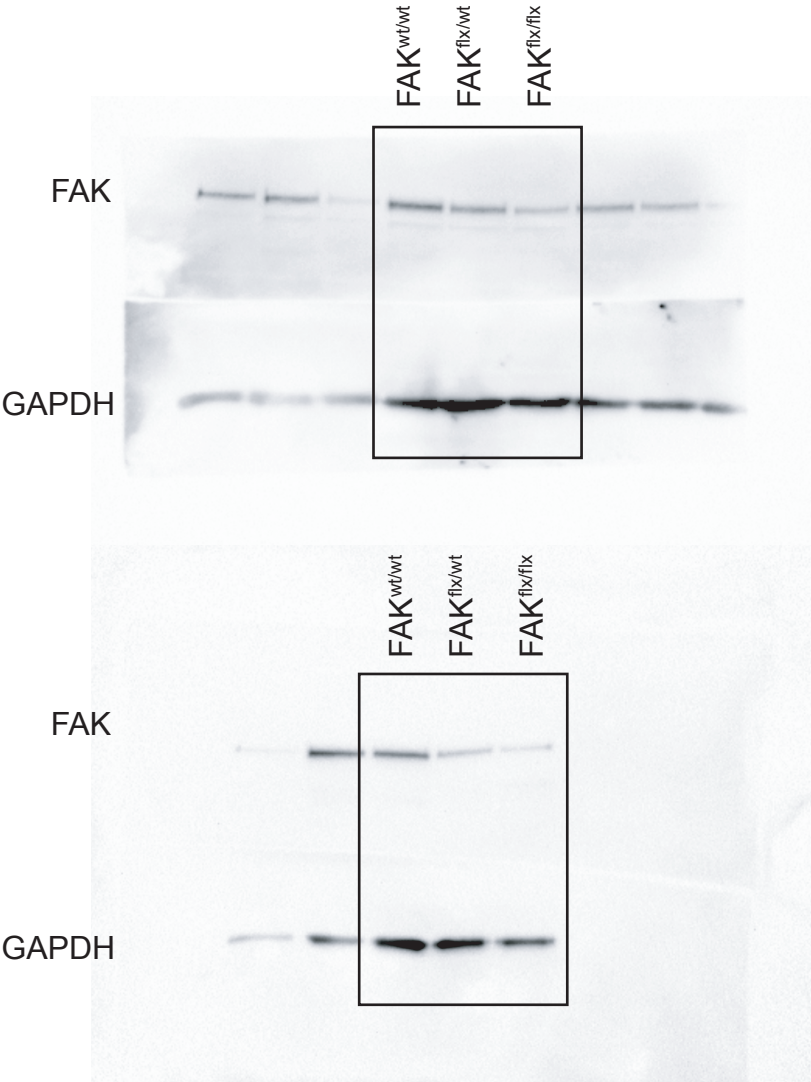

Supplement: fig9-data1 [file elife-69182-fig9-data1-v3.zip]
